# Supplementary material for: Calibration of Thermal Dissipation Probes for Xylem Sap Flow in the Wood of a Diffuse-Porous and a Conifer Species under Cyclic Heating
Source: MDPI journal article supplement (doi:10.3390/f13111964), 2022-11-21
Supplement: s1 [file s1]

Archive with 1 entries (1 files):
- forests-2020635-supplementary.pdf
