# Supplementary material for: Calibration of Thermal Dissipation Probes for Xylem Sap Flow in the Wood of a Diffuse-Porous and a Conifer Species under Cyclic Heating
Source: MDPI journal article supplement (doi:10.3390/f13111964), 2022-11-21
Supplement: s1 [file s1 › forests-2020635-supplementary.pdf]

In order to determine whether 30 min was sufficient for the probe to complete cooling, a pre-test was conducted before the start of this study experiment. We set up two sets of probes on *Pinus burgeana* and *Salix matsudana* with 30/30 (30 min heating and 30 min cooling, test) and unheated(reference), to observation the actual temperature difference of reference probes ( $\Delta T_0$ ) and the temperature difference at the end of cooling stage of the test probes ( $\Delta T_A$ ).

The temperature difference at the end of the cooling stage of the test probe showed a similar diurnal dynamic to the actual temperature difference shown by the reference probe, which was higher at night than at day (Figure S1 (a) and (b)). The small natural temperature difference of *P. burgeana* may be related to the location of the sample plant in the forest and the location of *S. matsudana* at the forest edge. There has significant relationship between in two species( $P<0.01$ ). The temperature difference after cooling stage still overestimates the actual temperature difference to some extent, but this overestimate is less than 10% (Figure S1 (c) and (d)). That is to say, the temperature difference after 30min cooling can represent the actual natural temperature difference to some extent.

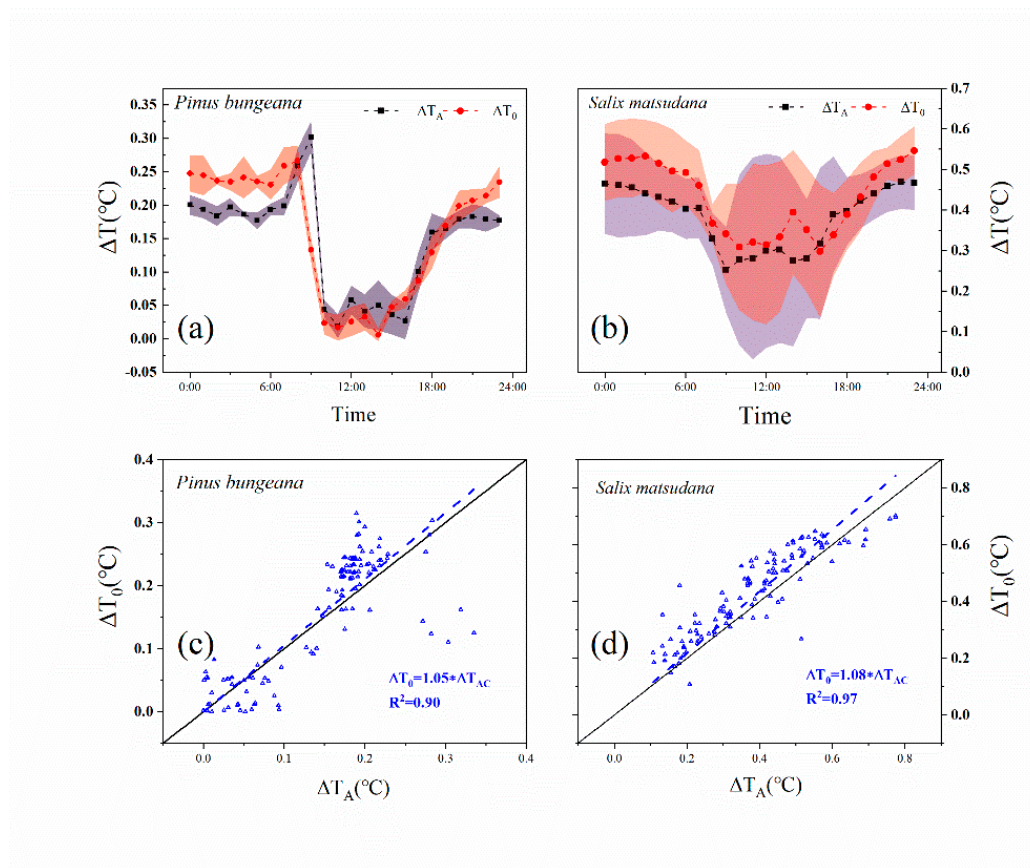

Therefore, we designed the heating mode mentioned in this study.

Figure S1. The diurnal dynamic of  $\Delta T_A$  (actual temperature difference of reference probes) and  $\Delta T_0$  (temperature difference at the end of cooling stage of the test probes) of *Pinus burgeana* (a) and *Salix matsudana* (b). Dots and shade represent mean values and standard deviations calculated from five days, respectively. The relationship between  $\Delta T_A$  with  $\Delta T_0$  in *Pinus burgeana* (c) and *Salix matsudana* (d).
